# Supplementary material for: Comparative cost analysis of point-of-care versus laboratory-based testing to initiate and monitor HIV treatment in South Africa
Source: PubMed Central journal article supplement (PMC6795460; doi:10.1371/journal.pone.0223669), 2019-10-16
Supplement: pone.0223669.s001.pdf [file pone.0223669.s001.pdf]

## **S1 Information about POC instrument costs**

POC CD4 count instrument/maintenance costs included the Pima™ CD4 instrument, quality control (QC) reagents, refrigerator to house QC reagents, and value of laboratory space. POC HIV VL instrument/maintenance costs included the GeneXpert® HIV-1 viral load instrument (computer, software, and printer included as a package from the manufacturer) and value of laboratory space. POC Creatinine instrument/maintenance costs included the StatSensor® Xpress-i™ Creatinine POC instrument and QC reagents.
