# Supplementary material for: Comparative cost analysis of point-of-care versus laboratory-based testing to initiate and monitor HIV treatment in South Africa
Source: PubMed Central journal article supplement (PMC6795460; doi:10.1371/journal.pone.0223669), 2019-10-16
Supplement: pone.0223669.s003.pdf [file pone.0223669.s003.pdf]

1 **S3 Toxic Material Disposal**

2 The POC HIV VL cartridges contain guanidine thiocyanate: a toxic material used as a lysis  
3 reagent that must be disposed of using high-temperature incineration (850 degrees C). This  
4 process is expensive and may present extra costs for clinics lacking easy access to these  
5 specialized incinerators.[31]
