# Supplementary material for: Comparative cost analysis of point-of-care versus laboratory-based testing to initiate and monitor HIV treatment in South Africa
Source: PubMed Central journal article supplement (PMC6795460; doi:10.1371/journal.pone.0223669), 2019-10-16
Supplement: pone.0223669.s004.pdf [file pone.0223669.s004.pdf]

**S1 Table 1.** Assumptions and data sources for centralized laboratory tests and individual cost components of POC tests

| <b>Cost Component</b>       | <b>Assumptions</b>                                                                                                                                                                                                                                       | <b>Data Source</b>                                                                                             |
|-----------------------------|----------------------------------------------------------------------------------------------------------------------------------------------------------------------------------------------------------------------------------------------------------|----------------------------------------------------------------------------------------------------------------|
| <b>Medical Consumables</b>  | Includes non-reusable items required to collect blood samples from patients. Excludes sharps/waste containers, toner, and paper, as these costs were negligible.                                                                                         | Organization's invoices                                                                                        |
| <b>POC Test Supplies</b>    | Includes POC creatinine test strips and POC HIV VL and POC CD4 count test cartridges. Prices include an NGO discount.                                                                                                                                    | Quotes from medical supply companies                                                                           |
| <b>POC Instrument Costs</b> | Uses prices available to NGOs. Each instrument was assumed to have a 5-year lifetime. Required lab space was estimated, and cost calculated from standard commercial floor space value. Assumes clinic already has stable electricity access and backup. | Quotes from companies, excluding centrifuge and refrigerator: estimated based on quotes from various suppliers |
| <b>POC Recurrent Costs</b>  | Includes maintenance and QC materials. Electricity costs and waste per test was assumed to be negligible towards total cost.                                                                                                                             | Quotes from companies                                                                                          |
| <b>Personnel</b>            | Calculated as time spent directly participating in obtaining sample or performing test.                                                                                                                                                                  | Calculated from government sources, direct observation of activities, and staff interviews                     |
| <b>Centralized Tests</b>    | Based on NHLS quoted prices and assumed to include overhead, transportation costs, staff costs, etc.                                                                                                                                                     | NHLS 2017 price list quotes from a local private sector laboratory                                             |
