# Supplementary material for: Comparative cost analysis of point-of-care versus laboratory-based testing to initiate and monitor HIV treatment in South Africa
Source: PubMed Central journal article supplement (PMC6795460; doi:10.1371/journal.pone.0223669), 2019-10-16
Supplement: pone.0223669.s005.pdf [file pone.0223669.s005.pdf]

**S2 Table 2.** Per-test and Per-patient cost of HIV monitoring tests performed as POC tests at various clinic loads, not including discounting costs.

| <b>Number of Patients Initiated per Month</b> | <b>10/ Month</b> | <b>20/ Month</b> | <b>50/ Month</b> | <b>100/ Month</b> |
|-----------------------------------------------|------------------|------------------|------------------|-------------------|
| <b>CD4 Count</b>                              |                  |                  |                  |                   |
| Clinic Medical Consumables                    | 0.41             | 0.41             | 0.41             | 0.41              |
| Lab Consumables                               | 0.11             | 0.11             | 0.11             | 0.11              |
| Cartridge/Test                                | 6.62             | 6.62             | 6.62             | 6.62              |
| Lab Staff Costs                               | 0.20             | 0.20             | 0.20             | 0.20              |
| Instrument/Supply Costs 5                     | 8.55             | 4.27             | 1.71             | 0.85              |
| Instrument/Supply Costs 10                    | 4.33             | 2.17             | 0.87             | 0.43              |
| Clinic Staff Costs                            | 0.44             | 0.44             | 0.44             | 0.44              |
| <b>Total Per Test for 5 years</b>             | <b>16.33</b>     | <b>12.05</b>     | <b>9.49</b>      | <b>8.63</b>       |
| <b>Total Per test for 10 years</b>            | <b>12.11</b>     | <b>9.95</b>      | <b>8.65</b>      | <b>8.21</b>       |
| <b>Total Over 5 Years</b>                     | <b>32.66</b>     | <b>24.10</b>     | <b>18.98</b>     | <b>17.26</b>      |
| <b>Total Over 10 Years</b>                    | <b>24.22</b>     | <b>19.89</b>     | <b>17.29</b>     | <b>16.43</b>      |
| <b>HIV Viral Load</b>                         |                  |                  |                  |                   |
| Clinic Medical Consumables                    | 0.41             | 0.41             | 0.41             | 0.41              |
| Lab Consumables                               | 0.11             | 0.11             | 0.11             | 0.11              |
| Cartridge/Test                                | 18.82            | 18.82            | 18.82            | 18.82             |
| Lab Staff Costs                               | 0.33             | 0.33             | 0.33             | 0.33              |
| Instrument/Supply Costs 5                     | 13.93            | 6.96             | 2.79             | 1.39              |
| Instrument/Supply Costs 10                    | 4.15             | 2.08             | 0.83             | 0.42              |
| Clinic Staff Costs                            | 0.44             | 0.44             | 0.44             | 0.44              |
| <b>Total Per Test for 5 years</b>             | <b>34.04</b>     | <b>27.07</b>     | <b>22.90</b>     | <b>21.50</b>      |
| <b>Total Per test for 10 years</b>            | <b>24.26</b>     | <b>22.19</b>     | <b>20.94</b>     | <b>20.53</b>      |
| <b>Total Over 5 Years</b>                     | <b>170.19</b>    | <b>135.37</b>    | <b>114.48</b>    | <b>107.51</b>     |
| <b>Total Over 10 Years</b>                    | <b>242.65</b>    | <b>221.87</b>    | <b>209.41</b>    | <b>205.25</b>     |
| <b>Creatinine</b>                             |                  |                  |                  |                   |
| Clinic Medical Consumables                    | 0.22             | 0.22             | 0.22             | 0.22              |
| Lab Consumables                               | 0.00             | 0.00             | 0.00             | 0.00              |
| Cartridge/Test                                | 8.14             | 8.14             | 8.14             | 8.14              |
| Lab Staff Costs                               | 0.00             | 0.00             | 0.00             | 0.00              |
| Instrument/Supply Costs 5                     | 0.61             | 0.31             | 0.12             | 0.06              |
| Instrument/Supply Costs 10                    | 0.22             | 0.11             | 0.04             | 0.02              |
| Clinic Staff Costs                            | 0.22             | 0.22             | 0.22             | 0.22              |
| <b>Total Per Test for 5 years</b>             | <b>9.19</b>      | <b>8.89</b>      | <b>8.70</b>      | <b>8.64</b>       |
| <b>Total Per test for 10 years</b>            | <b>8.80</b>      | <b>8.69</b>      | <b>8.62</b>      | <b>8.60</b>       |
| <b>Total Over 5 Years</b>                     | <b>64.35</b>     | <b>62.21</b>     | <b>60.92</b>     | <b>60.49</b>      |

|                                   |               |               |               |               |
|-----------------------------------|---------------|---------------|---------------|---------------|
| <b>Total Over 10 Years</b>        | <b>105.65</b> | <b>104.30</b> | <b>103.50</b> | <b>103.23</b> |
| <b>Grand total over 5 years</b>   | <b>267.20</b> | <b>221.68</b> | <b>194.38</b> | <b>185.26</b> |
| <b>Grand total over 10 years</b>  | <b>372.52</b> | <b>346.07</b> | <b>330.20</b> | <b>324.91</b> |
| <b>Grand total no Cr 5 years</b>  | <b>202.85</b> | <b>159.47</b> | <b>133.46</b> | <b>124.77</b> |
| <b>Grand total no Cr 10 years</b> | <b>266.87</b> | <b>241.77</b> | <b>226.70</b> | <b>221.68</b> |
